# Supplementary material
Source: PubMed Central journal article supplement (PMC3523368)
Supplement: hesr0047-2137-SD3.pdf [file hesr0047-2137-SD3.pdf]

| <b>Appendix Table 1: Changes in Outpatient and Pharmacy Utilization Associated with EMR-Based Clinical Decision Support: Pre, Post, and Difference Estimates</b> |              |         |            |         |
|------------------------------------------------------------------------------------------------------------------------------------------------------------------|--------------|---------|------------|---------|
|                                                                                                                                                                  |              |         |            |         |
| Intervention                                                                                                                                                     |              |         |            |         |
|                                                                                                                                                                  | Pre          | Post    | Difference | P-Value |
| Visits                                                                                                                                                           | 8.8          | 9.3     | .4         | .363    |
| Labs                                                                                                                                                             | 2.1          | 2.6     | .5         | <.001   |
| Pharmacy Fills                                                                                                                                                   | 36.2         | 37.0    | .8         | .853    |
|                                                                                                                                                                  |              |         |            |         |
| Control                                                                                                                                                          |              |         |            |         |
|                                                                                                                                                                  | Pre          | Post    | Difference | P-Value |
| Visits                                                                                                                                                           | 10.1         | 10.7    | .6         | .243    |
| Labs                                                                                                                                                             | 2.2          | 2.6     | .4         | <.001   |
| Pharmacy Fills                                                                                                                                                   | 36.3         | 37.3    | 1.0        | .647    |
|                                                                                                                                                                  |              |         |            |         |
| Differences                                                                                                                                                      |              |         |            |         |
|                                                                                                                                                                  | Intervention | Control | DID        | P-Value |
| Visits                                                                                                                                                           | .4           | .6      | -.2        | .859    |
| Labs                                                                                                                                                             | .5           | .4      | .1         | .389    |
| Pharmacy Fills                                                                                                                                                   | .8           | 1.0     | -.2        | .949    |

Estimates are calculated using generalized linear models controlling for age and gender and are standardized to the underlying population characteristics.

| <b>Appendix Table 2: Changes in Pharmacotherapy Associated with EMR-Based Clinical Decision Support: Difference-in-Difference Estimates</b> |                        |         |                           |         |
|---------------------------------------------------------------------------------------------------------------------------------------------|------------------------|---------|---------------------------|---------|
|                                                                                                                                             | Use of Pharmacotherapy |         | High Dose Pharmacotherapy |         |
|                                                                                                                                             | Odds Ratio             | P-Value | Odds Ratio                | P-Value |
| Insulin                                                                                                                                     | .94                    | .760    | -                         | -       |
| Sulfonylureas                                                                                                                               | 1.28                   | .176    | 1.38                      | .008    |
| Metformin                                                                                                                                   | .96                    | .814    | .92                       | .457    |
| Thiazolidinediones                                                                                                                          | 1.56                   | .059    | .64                       | .040    |
| Exenatide                                                                                                                                   | .40                    | .052    | -                         | -       |

This table presents coefficient estimates (displayed as odds ratios) associated with the probability of use of each of the specific types of pharmacotherapy, as well as the probability of filling a prescription for a high vs. low dose (proxied by pill size) among users of each pharmacotherapy. The coefficients estimates are calculated using logistic regression models controlling for age and gender. These are coefficients on the time by study arm interaction term, and thus represent the incremental effect of the intervention on patterns of pharmacotherapy. Use of high dose pharmacotherapy cannot be calculated for intravenous medications including insulin and Exenatide.
